# Supplementary material for: Crystal growth of the 2D Janus rhodium chalcohalide RhSeCl
Source: Royal Society of Chemistry journal article supplement (doi:10.1039/d2qi02699f), 2023-01-01
Supplement: d2qi02699f1.pdf [file d2qi02699f1.pdf]

## Supporting Information

### Crystal growth of a 2D Janus rhodiumchalcogenide RhSeCl

Domenic Nowak,<sup>\*a</sup> Martin Valldor,<sup>b</sup> Bastian Rubrecht,<sup>a,c</sup> Samuel Froeschke,<sup>a</sup> Samar Eltoukhy,<sup>a</sup> Bernd Büchner,<sup>a,c</sup> Silke Hampel,<sup>\*a</sup> and Nico Gräbner<sup>\*a</sup>

<sup>a</sup> Leibniz-Institute for Solid State and Materials Research Dresden, Helmholtzstraße 20, D-01069 Dresden, Germany. E-mail: d.nowak@ifw-dresden.de, s.hampel@ifw-dresden.de and n.graessler@ifw-dresden.de

<sup>b</sup> Department of Chemistry, University of Oslo, NO-0315 Oslo, Norway.

<sup>c</sup> Institute for Solid State Physics, Technical University Dresden, D-01062 Dresden, Germany.

### Synthesis process

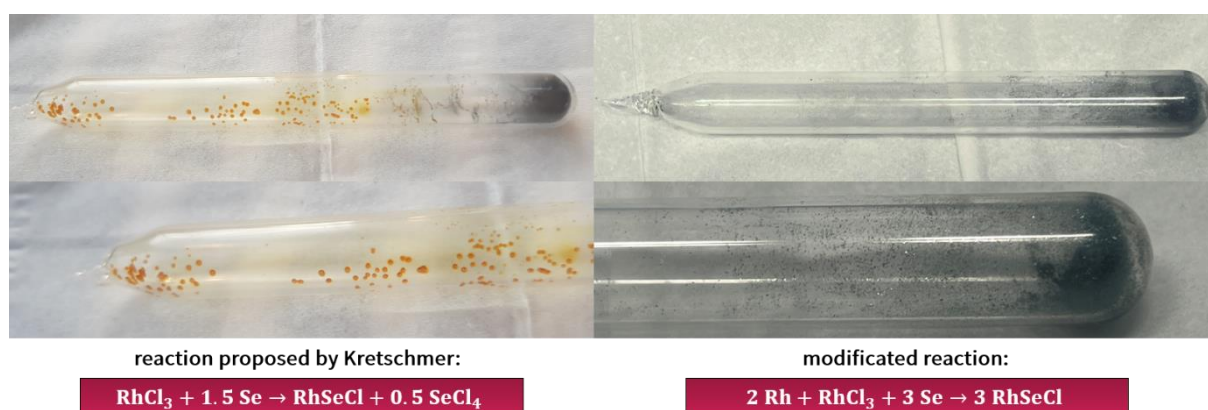

**Fig. S1:** Proposed and modified solid state reaction for the synthesis of RhSeCl.<sup>1</sup> While in the initial reaction an excess of Se was present, yellow crystals of SeCl<sub>4</sub> have been formed. To counteract this factor, we have reformulated the reaction equation and added rhodium so that no by-products are formed.

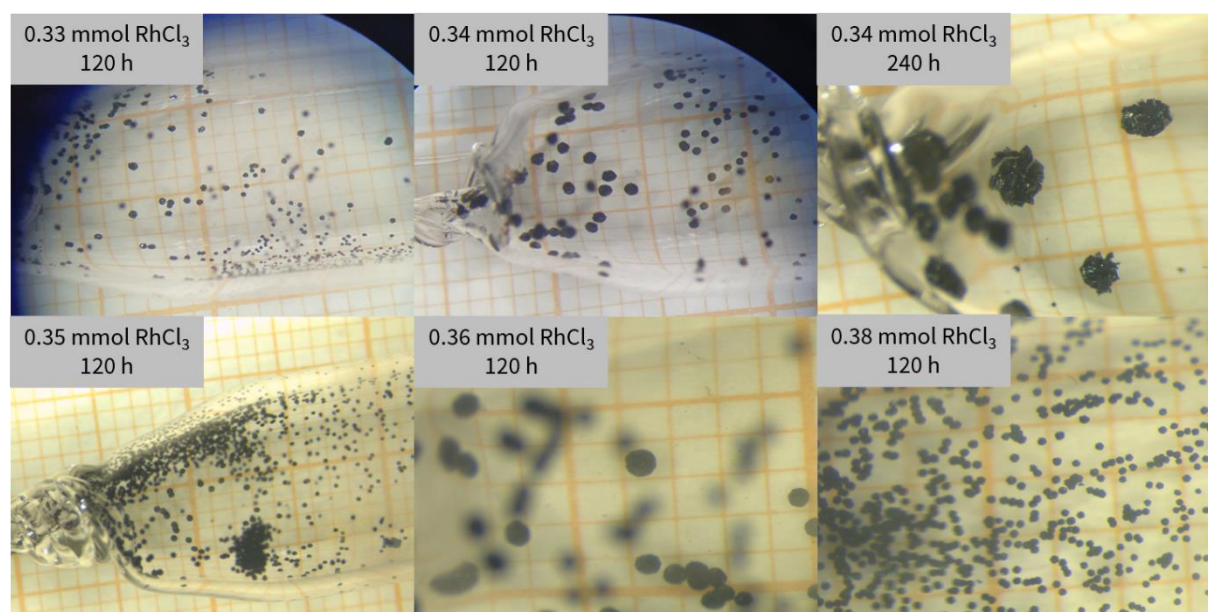

**Fig. S2:** Overview of the CVT growth experiments. All experiments were done with the same starting materials, only an excess RhCl<sub>3</sub> was used. The temperature gradient [ $\Delta T = 100 \text{ K}$  ( $T_1 = 900 \text{ }^\circ\text{C}$ ,  $T_2 = 1000 \text{ }^\circ\text{C}$ )] and the heating rate of 2,5 K/min were the same. The temperature was hold for 5 (10) days and then cooled down to room temperature. Till a certain excess (0.04 mmol) of RhCl<sub>3</sub> the crystals were growing larger, but after exceeding it the impact of the raised amount was minor on the crystal growth.

## Energy dispersive X-ray spectroscopy

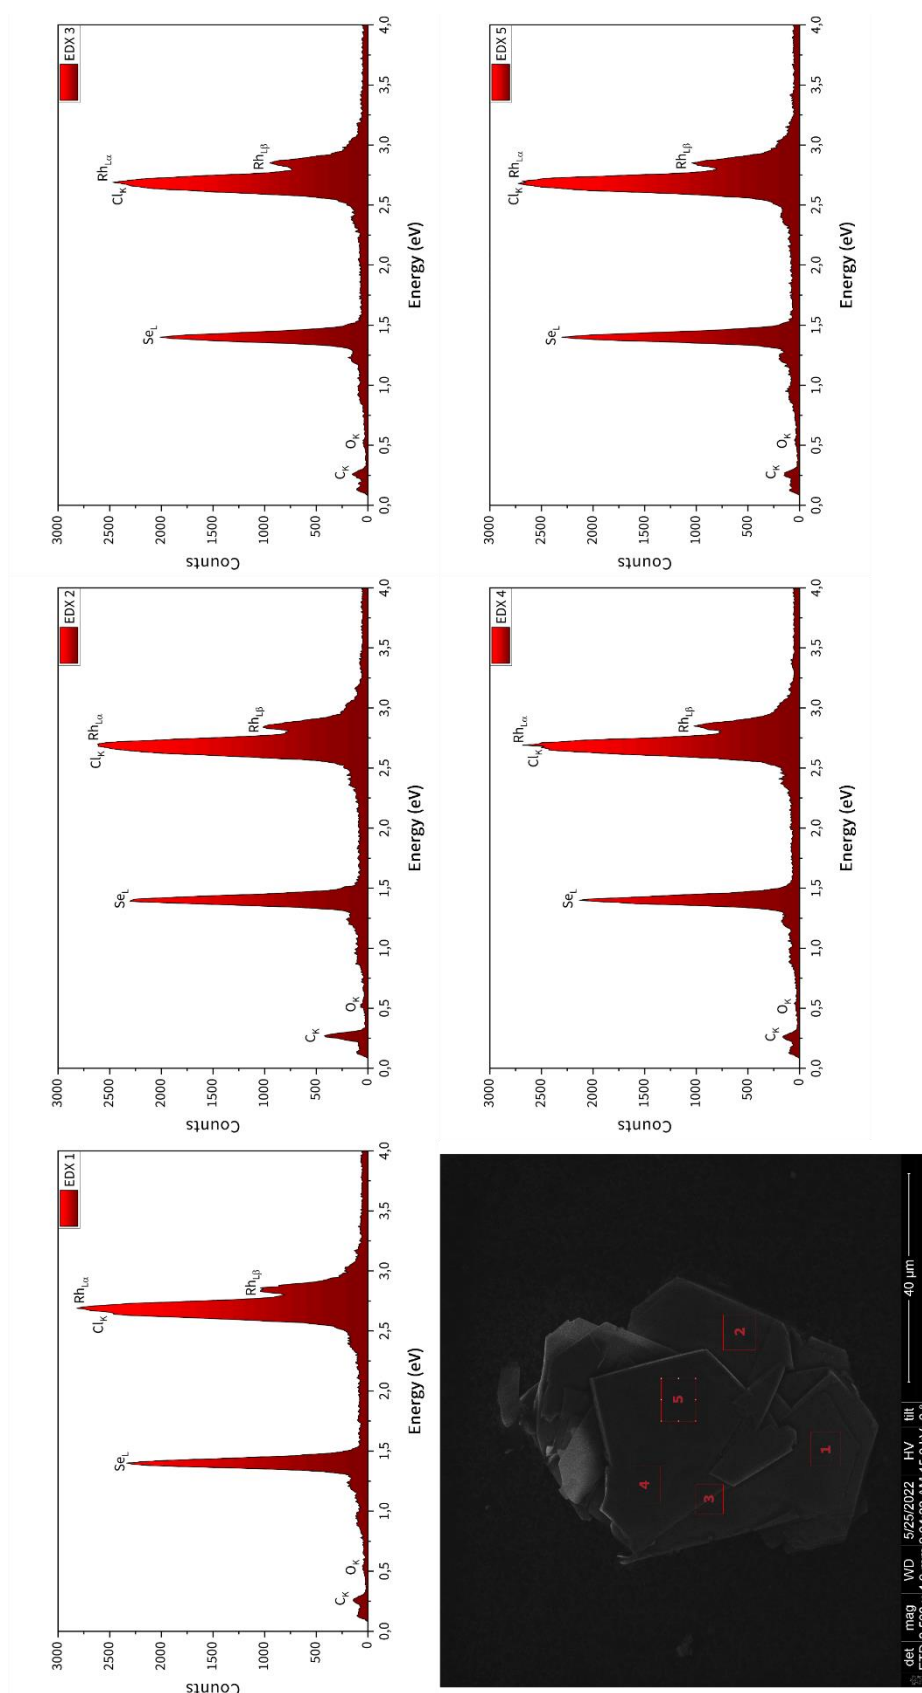

**Fig. S3:** EDX-spectra of an RhSeCl crystal are showing a strong overlap between the Cl<sub>K</sub> and the Rh<sub>Lα</sub> energy line.

**Tab. S1:** Atomic distribution of the elements in the measured areas according to the EDX spectra.

|         | Rh / At-% | Cl / At-% | Se / At-% |
|---------|-----------|-----------|-----------|
| 1       | 35.9      | 30.8      | 33.3      |
| 2       | 36.0      | 30.8      | 33.1      |
| 3       | 35.3      | 30.3      | 34.4      |
| 4       | 35.2      | 30.2      | 34.6      |
| 5       | 35.4      | 30.4      | 34.2      |
| Average | 35.6      | 30.5      | 33.9      |

## Crystal structure

**Tab. S2:** Listing of measured atomic distances and the octahedra angle with the DIAMOND Software<sup>2</sup> as well as the calculated mono- and interlayer height in RhSeCl, RhTeCl, RhCl<sub>3</sub> and Rh<sub>2</sub>Se<sub>3</sub>.<sup>3-5</sup>

| RhSeCl                          |                          |                          |                              |                         |                         |                          |
|---------------------------------|--------------------------|--------------------------|------------------------------|-------------------------|-------------------------|--------------------------|
| $d_{Rh-Cl} / \text{\AA}$        | $d_{Rh-Se} / \text{\AA}$ | $d_{Rh-Rh} / \text{\AA}$ | $\angle_{octa} / \text{\AA}$ | $l_{octa} / \text{\AA}$ | $h_{mono} / \text{\AA}$ | $h_{inter} / \text{\AA}$ |
| 2.51                            | 2.38                     | 3.49                     | 175.5                        | 4.89                    | 2.78                    | 5.79                     |
| RhTeCl                          |                          |                          |                              |                         |                         |                          |
| $d_{Rh-Cl} / \text{\AA}$        | $d_{Rh-Te} / \text{\AA}$ | $d_{Rh-Rh} / \text{\AA}$ | $\angle_{octa} / \text{\AA}$ | $l_{octa} / \text{\AA}$ | $h_{mono} / \text{\AA}$ | $h_{inter} / \text{\AA}$ |
| 2.51                            | 2.56                     | 3.87                     | 177.4                        | 5.08                    | 2.73                    | 5.69                     |
| 2.54                            | 2.57                     | —                        | 178.1                        | 5.11                    | —                       | —                        |
| —                               | 2.54                     | —                        | —                            | —                       | —                       | —                        |
| —                               | 2.58                     | —                        | —                            | —                       | —                       | —                        |
| RhCl <sub>3</sub>               |                          |                          |                              |                         |                         |                          |
| $d_{Rh-Cl} / \text{\AA}$        | $d_{Rh-Se} / \text{\AA}$ | $d_{Rh-Rh} / \text{\AA}$ | $\angle_{octa} / \text{\AA}$ | $l_{octa} / \text{\AA}$ | $h_{mono} / \text{\AA}$ | $h_{inter} / \text{\AA}$ |
| 2.31                            | —                        | 3.43                     | 175.8                        | 4.58                    | 2.49                    | 5.70                     |
| 2.29                            | —                        | —                        | 175.9                        | 4.61                    | —                       | —                        |
| Rh <sub>2</sub> Se <sub>3</sub> |                          |                          |                              |                         |                         |                          |
| $d_{Rh-Cl} / \text{\AA}$        | $d_{Rh-Se} / \text{\AA}$ | $d_{Rh-Rh} / \text{\AA}$ | $\angle_{octa} / \text{\AA}$ | $l_{octa} / \text{\AA}$ | $h_{mono} / \text{\AA}$ | $h_{inter} / \text{\AA}$ |
| —                               | 2.46                     | 3.35                     | 161.5                        | 4.92                    | —                       | —                        |
| —                               | 2.50                     | —                        | 169.4                        | 4.98                    | —                       | —                        |
| —                               | 2.42                     | —                        | 160.7                        | 4.85                    | —                       | —                        |
| —                               | 2.53                     | —                        | —                            | —                       | —                       | —                        |

## References

- 1 J. Kretschmer, *PhD Thesis*, Rheinischen Friedrich–Wilhelms–Universität Bonn, 2018.
- 2 Dr. H. Putz & Dr. K. Brandenburg GbR, *Diamond - Crystal and Molecular Structure Visualization*, 2022.
- 3 J. Köhler and W. Urland, *Zeitschrift für anorganische und allgemeine Chemie*, 1997, **623**, 583–586.
- 4 H. Bärnighausen and B. Handa, *Journal of the Less Common Metals*, 1964, **6**, 226–231.
- 5 E. Parthé, E. Hohnke and F. Hulliger, *Acta Crystallographica*, 1967, **23**, 832–840.
